# Supplementary material for: Perceived barriers to randomised controlled trials in breast reconstruction: obstacle to trial initiation or opportunity to resolve? A qualitative study
Source: Springer Nature journal article supplement (doi:10.1186/s13063-020-4227-1), 2020-04-06
Supplement: MOESM2 [file 17870528]

## **Topic guide for iBRA phase 3 qualitative interviews interviews with surgeons and specialist nurses involved in performing or counselling patients undergoing implant-based breast reconstruction**

### **Introduction:**

- Thank you for taking time
- Want to explore views about RCTs in implant-based breast reconstruction No right or wrong answers, can stop the interview at any time
- Take verbal consent
- Remind them that the interviews are being audio-recorded, assure confidentiality

### **Can you tell me about yourself?**

- What is your current position, role and level of experience in the field
- What types of implant reconstruction are performed in your unit (pre-pectoral/subpectoral; different types of meshes)
  - Why is this/why do you think this is
  - Evidence for this/participation in earlier phases of iBRA

### **i. Study designs and comparators**

**As you know, one of the aims of iBRA was to determine the feasibility of undertaking a RCT in IBBR so I'm interested in hearing your views around this.**

- Do you think it's possible to undertake an RCT in IBBR? (explore views)
- Would another type of study design be better? (explore views)
- What do you think your colleagues (surgeons and nurses) might think?
- How comfortable would you feel in inviting patients to an RCT in IBBR? (explore views)
- Do you think patients would be likely to participate? Why?
- What would make a trial possible?
- What would make a trial difficult?
- Do you think there could be sufficient equipoise amongst surgeons and nurses to make an RCT feasible?
- Where do you think there is equipoise (*different types of mesh; pre-pec/subpectoral implants; different types of implants*)
- What studies would you be happy to recruit patients in to (and why)?
- Which would you **not** be happy to recruit into and why?
- What do you think the challenges of a potential RCT would be?
- How do you think these could be overcome?
- Explore any specific issues raised in survey

### **ii. Degrees of pragmatism and attitudes to concomitant interventions**

**We are keen to ensure that any future trial is acceptable to surgeons performing IBBR and is also pragmatic (reflects the real world).**

**What are your thoughts? Should all aspects of the procedure be standardised or should surgeons be allowed to decide for themselves about things like drains and antibiotics?**

- What things do you think should be standardised, if any?
- What things can be left to individual surgeons to decide? (*specifically ask about infection prevention bundles incl. antibiotics; types of mesh; drains; follow up etc*)

- How would you feel if the trial mandated an SSI bundle/specific type of mesh etc?
- Explore any specific issues raised in survey responses

iii. **Outcome selection**

**What outcomes do you think we should measure in the trial? Who is best place to determine these?**

- Primary outcomes?
- Secondary outcomes?
- How do you think they should be assessed?
- When do they think they should be assessed?
- Explore any specific issues raised in the survey

**Ending the interview**

- Is there anything else that I haven't mentioned or that you want to add?

Thank for time, reiterate confidentiality, summarise key points
